# Supplementary material
Source: publisher figshare collection journal article supplement (https://tandf.figshare.com/ndownloader/files/15445466)
Supplement: Supplementary file 1 [file 15445466]

# IFRA 1610563 - SUPPLEMENTARY FIGURES

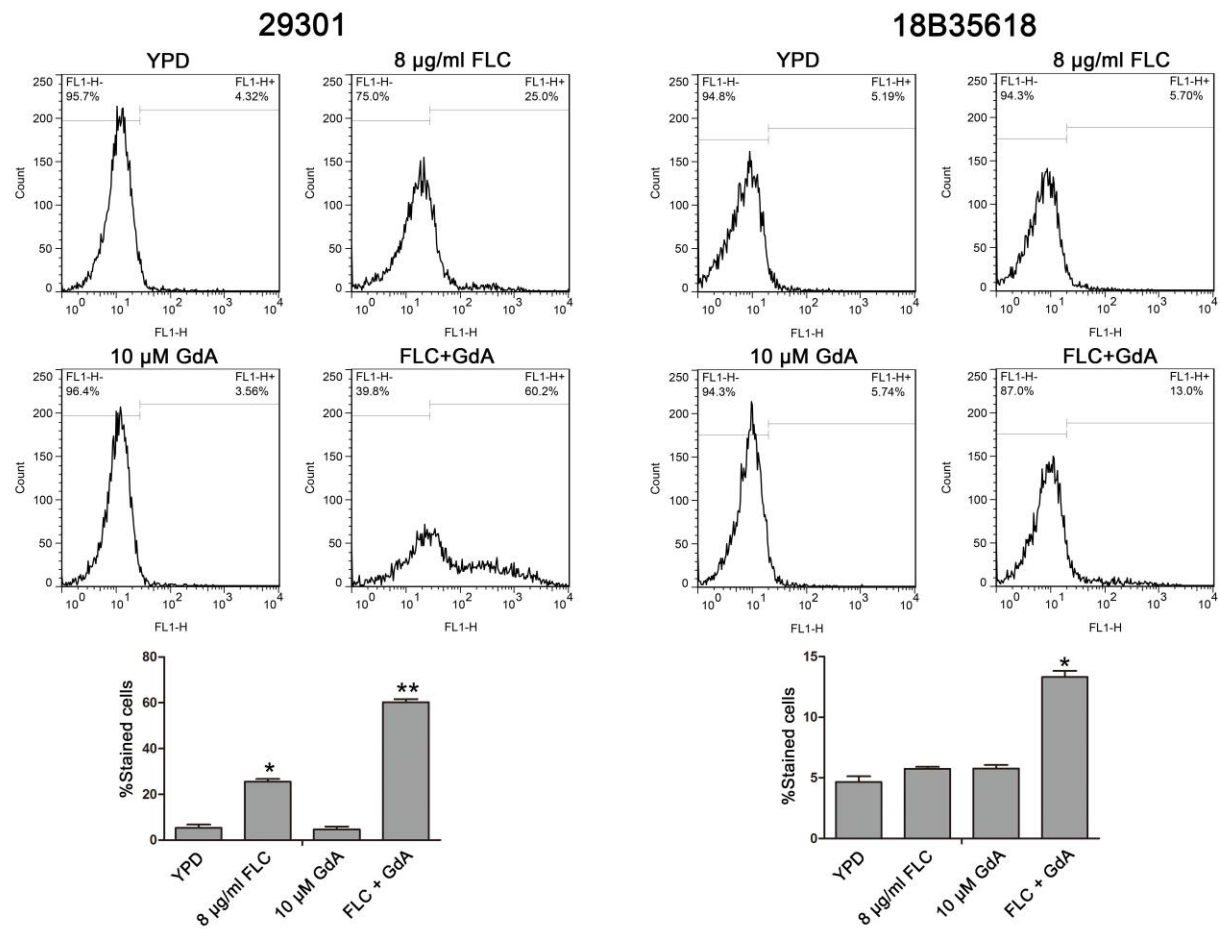

**Fig. S1.** Growth was determined in the fluconazole-sensitive strain (29301) and fluconazole-resistant strain (18B35618) after treatment by fluconazole, GdA, and fluconazole plus GdA for 24 h. Data was shown as mean  $\pm$  SD. \* $P$ <0.05, and \*\* $P$ <0.01 indicate significant difference between treatment group and the YPD group

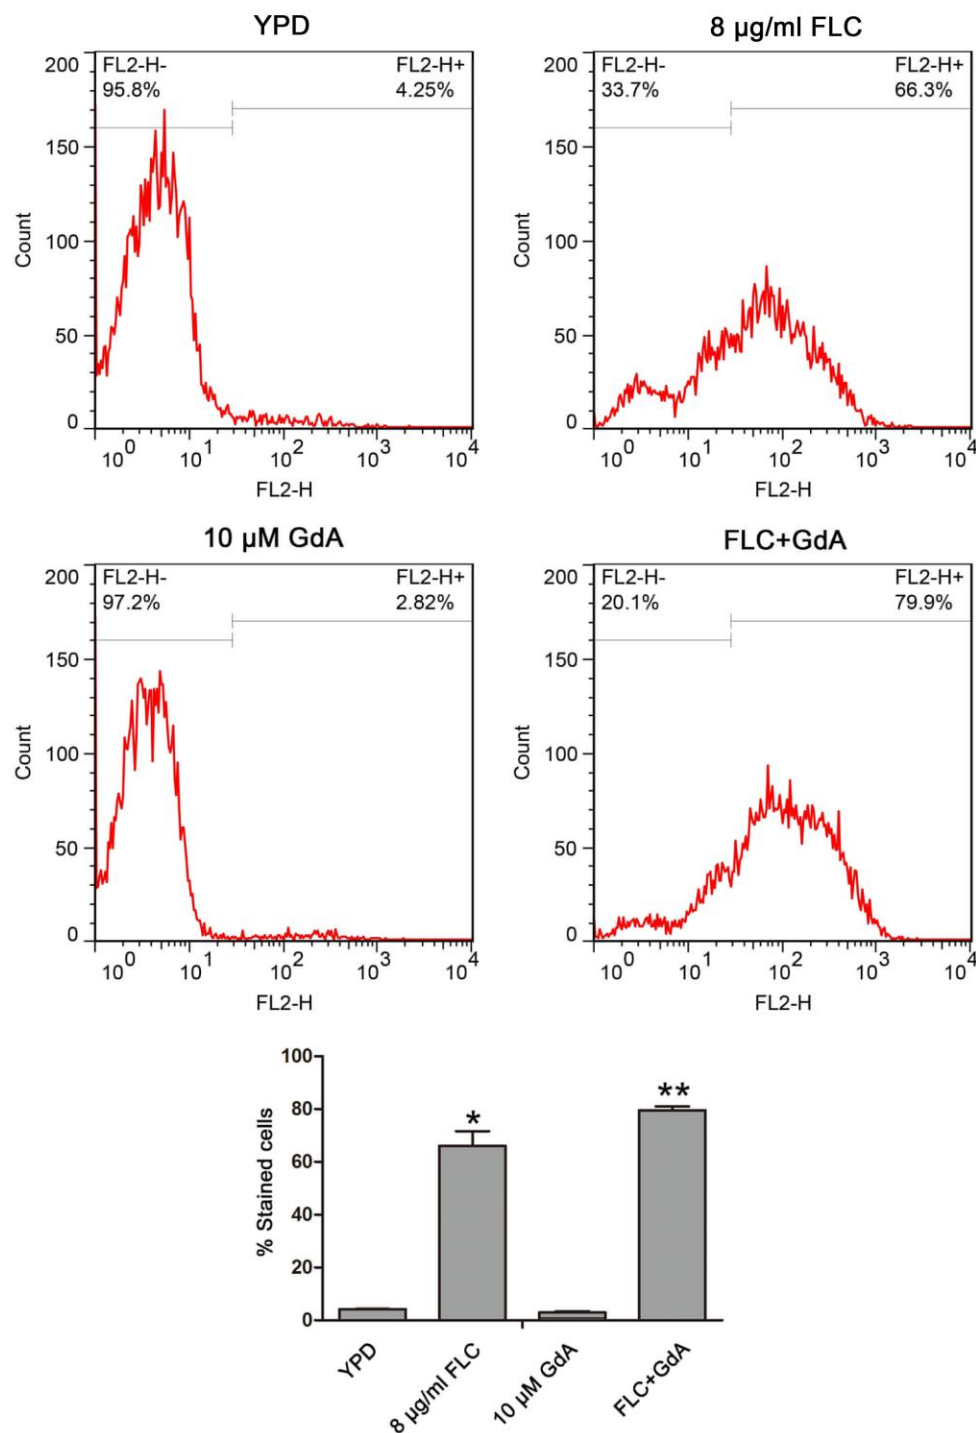

**Fig. S2.** ROS levels were measured in the fluconazole-sensitive strain (29301) and fluconazole-resistant strain (18B35618) after treatment by fluconazole plus GdA for 24 h. The histogram expressed the percentage of stained cells, and the data were exhibited as mean  $\pm$  SD. \* $P < 0.05$ , \*\* $P < 0.01$  versus the YPD group.
